# Supplementary figures and images for: Liver stiffness by transient elastography accompanies illness severity in COVID-19
Source: PubMed Central journal article supplement — BMJ Open Gastroenterol. 2020 Jul 13;7(1):e000445. doi: 10.1136/bmjgast-2020-000445 (PMC10577726; doi:10.1136/bmjgast-2020-000445), 2020-07-13

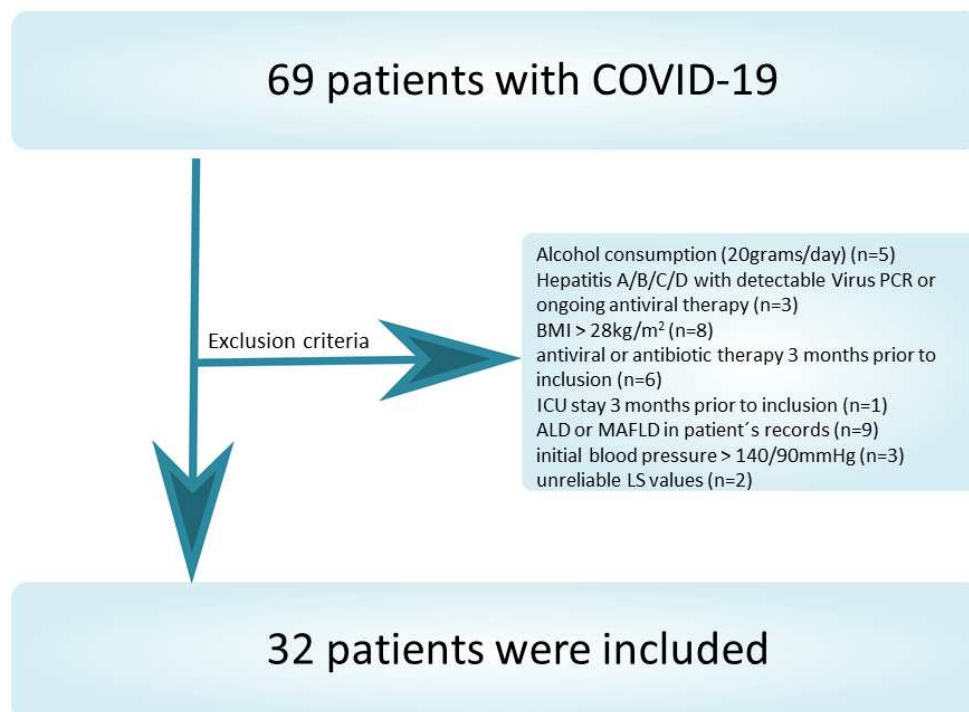

Supplement: bmjgast-2020-000445supp001.pdf [file bmjgast-2020-000445supp001.pdf]
